1 **The bacterial DNA binding protein MatP involved in linking the**  
2 **nucleoid terminal domain to the divisome at midcell interacts with**  
3 **lipid membranes**

4  
5 Begoña Monterroso,<sup>a,#</sup> Silvia Zorrilla,<sup>a,#</sup> Marta Sobrinos-Sanguino,<sup>a</sup> Miguel Ángel Robles-  
6 Ramos,<sup>a</sup> Carlos Alfonso,<sup>a</sup> Bill Söderström,<sup>b</sup> Nils Y Meiresonne,<sup>c</sup> Jolanda Verheul,<sup>c</sup> Tanneke den  
7 Blaauwen,<sup>c,#</sup> Germán Rivas<sup>a,#</sup>

8  
9 <sup>a</sup>Centro de Investigaciones Biológicas, Consejo Superior de Investigaciones Científicas (CSIC),  
10 Madrid, Spain.

11 <sup>b</sup>Structural Cellular Biology Unit, Okinawa Institute of Science and Technology, Okinawa,  
12 Japan.

13 <sup>c</sup>Bacterial Cell Biology & Physiology, Swammerdam Institute for Life Sciences, University of  
14 Amsterdam, Amsterdam, the Netherlands.

15  
16 **Running Head:** MatP alternates DNA and membrane lipid binding

17  
18 #Address correspondence to Begoña Monterroso, [monterroso@cib.csic.es](mailto:monterroso@cib.csic.es), Silvia Zorrilla,  
19 [silvia@cib.csic.es](mailto:silvia@cib.csic.es), Tanneke den Blaauwen, [T.denBlaauwen@uva.nl](mailto:T.denBlaauwen@uva.nl), or Germán Rivas (lead  
20 contact), [grivas@cib.csic.es](mailto:grivas@cib.csic.es).

21 B.M. and S.Z. contributed equally to this work.

22  
23  
24  
25  
26 Abstract word count: 329

27 Text word count: 5924

28

29

30

31 **ABSTRACT** Division ring formation at midcell is controlled by various mechanisms in  
32 *Escherichia coli*, one of them being the linkage between the chromosomal Ter macrodomain and  
33 the Z-ring mediated by MatP, a DNA binding protein that organizes this macrodomain and  
34 contributes to the prevention of premature chromosome segregation. Here we show that, during  
35 cell division, just before splitting the daughter cells, MatP seems to localize close to the  
36 cytoplasmic membrane, suggesting that this protein might interact with lipids. To test this  
37 hypothesis, we investigated MatP interaction with lipids *in vitro*. We found that MatP, when  
38 encapsulated inside microdroplets generated by microfluidics and giant vesicles, accumulates at  
39 phospholipid bilayers and monolayers matching the lipid composition in the *E. coli* inner  
40 membrane. MatP binding to lipids was independently confirmed using lipid coated microbeads  
41 and bio-layer interferometry assays. Interaction of MatP with the lipid membranes also occurs in  
42 the presence of the DNA sequences specifically targeted by the protein but there is no evidence  
43 of ternary membrane/protein/DNA complexes. We propose that the interaction of MatP with  
44 lipids may modulate its spatiotemporal localization and its recognition of other ligands.

45 **IMPORTANCE** The division of an *E. coli* cell into two daughter cells with equal genomic  
46 information and similar size requires duplication and segregation of the chromosome and  
47 subsequent scission of the envelope by a protein ring, the Z-ring. MatP is a DNA binding protein  
48 that contributes both to the positioning of the Z-ring at midcell and the temporal control of  
49 nucleoid segregation. Our integrated *in vivo* and *in vitro* analysis provides evidence that MatP  
50 can interact with lipid membranes comprising the phospholipid mixture in the *E. coli* inner  
51 membrane, without concomitant recruitment of the short DNA sequences specifically targeted by  
52 MatP. This observation strongly suggests that the membrane may play a role in the regulation of  
53 the function and localization of MatP, which could be relevant for the coordination of the two  
54 fundamental processes in which this protein participates, nucleoid segregation and cell division.

55

56

57 **KEYWORDS** bacterial division, DNA binding proteins, protein-membrane interaction, division  
58 site selection, biochemical reconstruction

59

60

61

## 62 INTRODUCTION

63 Bacterial division is achieved through the assembly of a protein machinery into a membrane  
64 anchored ring that splits the cell generating two daughter cells with equal genomic information  
65 (1). The scaffold for the involved proteins is the self-assembling protein FtsZ. The need of a  
66 precise localization of this Z-ring in the middle of the cell is fulfilled by different mechanisms  
67 evolved in bacteria, the canonical ones being the Min system and nucleoid occlusion (2). An  
68 additional mechanism contributing to Z-ring positioning is the linkage between the Ter  
69 macrodomain of the chromosome and the Z-ring (Ter linkage (3)). While the two first systems  
70 exert their action through blockage of productive FtsZ assembly at certain locations, namely the  
71 vicinity of the nucleoid and the cell poles, the last one is a positive mechanism promoting  
72 assembly of the division machinery nearby the replication terminus region of the chromosome  
73 (4).

74

75 The Ter linkage consists of three proteins, MatP, ZapB, and ZapA which form a complex that  
76 links the chromosome to the Z-ring. MatP, a DNA binding protein, was identified by Mercier  
77 and coworkers (5), who showed that it is the main organizer of the Ter macrodomain of the  
78 chromosome, preventing its premature segregation through specific interaction with a short  
79 palindromic DNA sequence (*matS*) repeated 23 times within this macrodomain. There are no  
80 *matS* sequences outside the Ter macrodomain, which is in turn devoid of the sequences targeted  
81 by SlmA, the other DNA binding protein avoiding, through nucleoid occlusion, aberrant Z-ring  
82 positioning (6). It was recently found that, upon binding to the *matS* sites, MatP displaces  
83 MukBEF from the Ter domain (7) promoting the formation of a unique chromosomal region.  
84 The Ter domain progressively shifts towards the cell centre along the cell cycle (8) and by  
85 binding to ZapB remains localized at midcell during division in slowly growing cells (9, 10).  
86 During the last cell division stage the Ter macrodomain is segregated into each daughter cell  
87 while they separate. The cell division protein FtsK forms probably at this stage a hexameric  
88 DNA translocase that moves about 400 bp towards the *dif* sites close to the terminus of the  
89 chromosome while displacing MatP from its *matS* sites (11, 12) to assist in the segregation of the  
90 termini. The molecular mechanisms by which this last step of chromosome segregation and  
91 daughter cell separation are coordinated remain largely unknown.

92

93 In this work, we observed that MatP moves away from the division site near the end of the cell  
94 division cycle, leaving a still intact divisome including ZapB at midcell. Indeed, also the  
95 colocalization with the nucleoids seemed to be at least partly lost and MatP was often observed  
96 close to the cytoplasmic membrane. On the basis of these findings, we postulated that MatP  
97 could bind to the lipids in the cytoplasmic membrane. To verify this hypothesis, we investigated  
98 the interaction of MatP with lipids *in vitro*. We reconstructed the purified protein MatP inside  
99 microfluidics microdroplets and giant unilamellar vesicles (GUVs), and found a significant  
100 preference of the protein for the lipid membrane compared with the lumen of the container. The  
101 shift of the protein towards the membrane occurred also in the presence of an oligonucleotide  
102 containing the DNA sequence targeted by MatP, *matS*, but no accumulation of this sequence was  
103 detected at the membrane. Parallel experiments based on complementary biochemical  
104 approaches further supported the interaction of MatP with lipids. Our results indicate that MatP  
105 constitutes another example of a protein involved in division able of recognizing both nucleic  
106 acid sequences and lipid membranes, as previously described for MinD (13) and *Bacillus subtilis*  
107 Noc (14). Furthermore, we propose that the membrane binding of MatP serves to free the *matS*  
108 sites close to the *dif* site that is needed by FtsK to help the segregation of the termini into the two  
109 daughter cells.

110

## 111 **RESULTS**

### 112 **MatP localizes in between the nucleoid and ZapB at the end of the cell division cycle**

113 To investigate what the exact sequence of events is during the process of cell division, we  
114 previously analysed the localization of a large number of cell division proteins in steady state  
115 slowly growing cells (15, 16). The advantage of slowly growing cells is that they do not have  
116 multiple replication forks at least during the major part of their division cycle. When *E. coli* cells  
117 are grown to steady state, their length correlates well with the cell division cycle age. We have  
118 now investigated, as part of the proteins that are involved in the coupling of cell division and  
119 chromosome segregation, the localization of the nucleoids in relation to that of MatP and the  
120 protein complex responsible for division (divisome). MG1655 cells expressing MatP-mCherry  
121 (17) from the original locus in the chromosome were grown in minimal medium to steady state.  
122 In these cells the localization of its divisome partner ZapB and the divisome protein FtsN that  
123 marks the presence of a complete division machinery were determined by immunolabelling.

124

125 To be able to dissect what happens to the localization of these three proteins and the nucleoid  
126 (stained by DAPI), more than 16000 cells were imaged and analysed. MatP-mCh and ZapB  
127 colocalize during most of the cell division cycle and FtsN arrives later at midcell (**Fig. 1A**) as  
128 described (8, 15, 17). The concentration of MatP is constant during the cell cycle (**Fig. S1A**).  
129 The number of MatP dimers, species assumed based on previous structural *in vitro* data (17), per  
130 average cell in minimal medium was determined to be 180 (18). Using this number and the  
131 determined extra fluorescence at midcell (FCPlus (16)), the number of MatP dimers was  
132 calculated to be 60 in the foci at midcell at 80% of the cell division cycle age (**Fig. S1B**). MatP  
133 localizes in young cells as a diffuse focus, which moves toward the cells centre during the cell  
134 division cycle where it forms a more distinct concentrated focus (**Fig. 1AB** and **Fig. S1C**). When  
135 determining the position of the brightest pixel in the MatP foci, they seem to localize consistently  
136 close to the length axis of the cell (**Fig. S1D**) as was reported (19). However, after 90% of the  
137 cell division cycle MatP-mCh moves away from the divisome, whereas ZapB and FtsN remain  
138 almost till the cells are completely divided (**Fig. 1A**). Interestingly, inspection of the deeply  
139 constricting cells suggested that MatP is not following the nucleoid that is segregating but  
140 remains in between ZapB and the nucleoid. This suggests that at least part of the MatP protein is  
141 not binding to the Ter domain any longer and also not to ZapB.

142

143 Since we observed the signal of MatP often close to the membrane of the new poles, we  
144 wondered whether MatP might bind lipids, like was observed for other proteins binding to the  
145 chromosome such as the Noc protein (14). To determine whether MatP-mCh colocalized with  
146 the cytoplasmic membrane, we transformed MG1655::MatP-mCh with a plasmid pXL28 that  
147 expresses the integral membrane protein fusion mNeonGreen-(GGS)<sub>2</sub>-GlpT (20). Cells were  
148 grown to steady state and the colocalization of MatP and GlpT was determined by the  
149 colocalization of the fluorescence of both proteins using the Pearson coefficient (21) as a  
150 function of the cell division cycle (**Fig. S2A**). The same strain without plasmid was used to  
151 determine the amount of overlap with the mCh channel due to autofluorescence. The Pearson  
152 coefficient did increase from  $0.18 \pm 0.13$  in cells without the membrane staining mNG-GlpT to  
153  $0.32 \pm 0.13$  in cells that did express the protein, indicating some overlap. Because MatP-mCh  
154 consisted of one or two foci per cell and the mNG-GlpT was distributed evenly in the cell

155 membrane not a large overlap was to be expected and no striking difference in the very old cells  
156 was observed (**Fig. S2A**).

157

158 An increase in the Pearson coefficient due to binding of single MatP-mCh molecules (*i.e.* not  
159 bound to DNA) to lipids cannot be discarded, since they are not observable by wide field  
160 fluorescence microscopy. Trying to discriminate between these options we used structured  
161 illumination microscopy (SIM) of cells (**Fig. 1C**) immobilized in an upright position (**Fig. 1D**)  
162 using an agar-pad with a range of micrometre-sized holes and looked at the colocalization of  
163 MatP and GlpT. A collection of cells taken from one image (no selection) is shown in **Fig. 1D**.  
164 Many foci localized in the middle of the circumference of the cell short axis and some  
165 colocalization of MatP and the membrane was observed, reinforcing the idea that MatP could  
166 interact with lipids. The resolution of the microscope and the intensity of the mCherry signal  
167 were not sufficient to discriminate binding of single mCherry molecules to the membrane.  
168 Therefore, we decided to investigate the membrane binding of MatP further *in vitro*.

169

### 170 **MatP accumulates at the lipid boundaries of microdroplets and vesicles**

171 With the aim to investigate whether MatP had lipid affinity we encapsulated the protein, using  
172 microfluidics based technology, inside microdroplets as cell mimic systems surrounded by a  
173 lipid boundary resembling that of the *E. coli* inner membrane. MatP (with a tracer amount of  
174 MatP-Alexa 488) was included in one of the aqueous streams, the other one being buffer (**Fig.**  
175 **2A**). Microdroplets were formed when the aqueous solutions met the continuous phase,  
176 constituted by the *E. coli* lipids dispersed in mineral oil, at the production junction of the  
177 microchip. Interestingly, according to the confocal microscopy images of the samples, MatP was  
178 mostly located at the lipid interface inside the microdroplets, as reflected by the intensity profiles  
179 (**Fig. 2A**). Interaction of the protein with lipids was also found when the solution encapsulated  
180 inside microdroplets contained crowding agents like Ficoll or dextran together with MatP (**Fig.**  
181 **S3AB**). No preference for the lipid boundary was observed when the free Alexa 488 dye was  
182 encapsulated (**Fig. S3C**).

183

184 After this observation, we wanted to study whether MatP interaction with the lipids also occurred  
185 when the lipid boundary was a bilayer, which provides a better cell-like system, instead of the

186 monolayer surrounding the microdroplets. For this purpose, the microdroplets obtained by  
187 microfluidics were converted into GUVs, using a procedure based on the droplet transfer method  
188 (22), as previously described (23). The droplets acquired the bilayer upon transition from an oil  
189 phase to an aqueous solution through an interface coated with oriented lipids (**Fig. 2B**). The  
190 crowding agent Ficoll was encapsulated alongside with MatP and the osmolarity of the solutions  
191 was adjusted to improve vesicle integrity and yield. Confocal images of the samples and the  
192 corresponding intensity profiles showed a remarkable shift of green labelled MatP towards the  
193 lipid membrane of the GUVs (**Fig. 2B**). Binding to lipids also occurred when MatP was  
194 externally added to GUVs (**Fig. S4**).

195

196 These results showed that the division protein MatP interacts with lipid monolayers or bilayers  
197 resembling the composition of the *E. coli* inner membrane when encapsulated inside micron  
198 sized cytomimetic containers.

199

### 200 **MatP interacts with *E. coli* lipid bilayers at submicromolar concentrations**

201 To quantify the interaction of MatP with lipid membranes, bio-layer interferometry assays were  
202 conducted using biosensor tips coated with the *E. coli* lipid mixture. Addition of the protein  
203 resulted in a shift in the incident light directed through the biosensor, indicative of binding (**Fig.**  
204 **3A**). A dose-response curve obtained by varying the concentration of MatP showed that, above  
205 10 nM, the biosensor signal associated with binding increases with protein concentration, being  
206 saturated at around 1  $\mu$ M MatP (**Fig. 3B**). Analysis of this curve with an empirical Langmuir  
207 adsorption equation, with no assumption about the mechanism or stoichiometry of the binding,  
208 rendered a  $c_{50}$  value of 97 nM with a well-defined upper limit (**Fig. S5**), corresponding to the  
209 concentration of MatP at which half of the maximum response signal was observed.

210

211 The binding of MatP to lipids was also ascertained through co-sedimentation assays using  
212 microbeads coated with the *E. coli* lipids mixture and MatP labelled with Alexa 488. Significant  
213 depletion of the protein was observed after incubation with the beads and centrifugation, and the  
214 amount of protein bound increased with the concentration of protein at constant concentration of  
215 lipids (**Fig. 3C, Fig. S6**). Observation of the microbeads after incubation with the green labelled  
216 protein by confocal microscopy confirmed the interaction (**Fig. S6**). As in the bio-layer

217 interferometry experiments, the binding isotherm obtained by plotting the concentration of  
218 protein bound to the beads against the concentration of free protein was analysed using the  
219 empirical Langmuir isotherm (**Fig. 3C**). This analysis rendered a  $c_{50}$  of 65 nM, again with a well-  
220 defined upper limit (**Fig. S6**), close to the midpoint of the response curve obtained by bio-layer  
221 interferometry.

222

223 The bio-layer interferometry assays and the lipid coated microbead experiments further  
224 supported the interaction of MatP with lipids, showing that it occurs at submicromolar  
225 concentrations of the protein.

226

### 227 **MatP does not recruit *matS* to the membrane**

228 As MatP is a DNA binding protein, we asked if it was still able of binding to the *E. coli* lipids in  
229 the presence of oligonucleotides containing its specific binding sequence, *matS*. To approach this  
230 question, we first characterized the protein/DNA complexes in the working buffer used to  
231 encapsulate MatP. MatP behaved as a dimer, as determined by sedimentation and light scattering  
232 (see analysis of MatP·*matS* complexes under Supplementary information and **Fig. S7B**), in good  
233 agreement with previous data (17). The stoichiometry of the MatP·*matS* complex was  
234 determined to be two monomers of MatP and one molecule of the *matS19* target (**Fig. S7**), again  
235 in agreement with crystallography analysis (17). The  $K_d$  for the interaction, determined by  
236 fluorescence anisotropy under our experimental conditions, was  $15 \pm 2$  nM, in dimer units (see  
237 analysis of MatP·*matS* complexes under Supplementary information and **Fig S7**).

238

239 We next encapsulated MatP alongside with *matS19* inside microdroplets, to analyse the  
240 influence of the oligonucleotide on MatP interaction with the lipids. Encapsulation of MatP (with  
241 a tracer amount of MatP-Alexa 488) and *matS*-Alexa 647 showed that location of MatP, almost  
242 exclusively at the lipid boundary of the microdroplets or GUVs, was not altered by the presence  
243 of *matS*, while the DNA, in turn, remained homogeneously distributed in their lumen (**Fig. 4AB**).  
244 Remarkably, the intensity profiles showed a drop of the red signal at the edges of the vesicle  
245 where the green signal corresponding to MatP reaches its maximum. This strongly suggests that  
246 MatP at the membrane is not bound to the DNA. The concentrations of MatP and *matS19* in  
247 these experiments were well above their  $K_d$  of interaction and we used a protein (monomer)



248 molar excess relative to the DNA concentration above 2-fold, to ensure formation of the 2:1  
249 complex previously characterized in solution (see above). The same results were found either by  
250 including MatP and *matS* in two independent streams, triggering complex formation shortly  
251 before encapsulation, or by encapsulating the preformed complex (*i.e.* MatP and *matS* together in  
252 the two streams). Additional experiments in which the fluorescein labelled *matS* used in the  
253 fluorescence anisotropy binding titrations and unlabelled MatP were encapsulated showed, again,  
254 that the DNA remained in the lumen of the microdroplets (**Fig. S8A**). The images obtained in  
255 this case were indistinguishable from those corresponding to the encapsulation of fluorescein  
256 labelled *matS* alone (**Fig. S8B**). These experiments evidenced that MatP still binds to the lipid  
257 monolayers or bilayers of cell-like containers in the presence of *matS*, although there was no sign  
258 of concomitant DNA recruitment to the lipid edge.

259  
260 Next, we probed the influence of *matS* on the binding of MatP to lipids using microbeads coated  
261 with the *E. coli* lipid mixture and through bio-layer interferometry. Addition of 0.1-1  $\mu\text{M}$   
262 unlabelled *matS* prior or after incubation of MatP with the microbeads did not significantly  
263 modify the fraction of MatP-Alexa 488 bound with respect to that in the absence of *matS* (**Fig.**  
264 **4C**). Parallel experiments using fluorescein labelled *matS* and unlabelled MatP showed that the  
265 DNA did not bind to the lipids alongside with MatP, in good agreement with the images of the  
266 complex encapsulated inside lipid vesicles or microdroplets (**Fig. 4C**).

267  
268 Bio-layer interferometry assays conducted to measure the binding of MatP in the presence of  
269 constant 1  $\mu\text{M}$  concentration of *matS* rendered isotherms of binding superimposable, within  
270 error, with those obtained in the absence of *matS* (**Fig. S5**,  $c_{50} = 76 \text{ nM}$ ), and no significant  
271 interaction with the lipids was detected for *matS* alone (**Fig. 3A**). The signal of binding of MatP  
272 (150 nM) to the lipids remained relatively insensitive to the concentration of *matS* below 30  $\mu\text{M}$ ,  
273 showing a decrease at higher concentrations (**Fig. 4D**) that suggests competition between the  
274 lipids and the DNA for binding to the protein. These experiments show that the interactions of  
275 MatP are relatively insensitive to the presence *matS*, which only seems to compete with lipid  
276 binding at high concentrations.

277

278

279 **DISCUSSION**

280 Here we have found that the protein of the Ter linkage MatP interacts with membranes matching  
281 the lipid composition of the *E. coli* inner membrane, as shown by encapsulation in cell-like  
282 containers, co-sedimentation with lipid coated microbeads and bio-layer interferometry assays.  
283 Although MatP presents dual recognition of lipids and nucleic acid sequences, we have not  
284 found any indication supporting the formation of ternary complexes, strongly suggesting that  
285 both types of ligands may be mutually exclusive, which is also illustrated by the predominantly  
286 axial localization of the MatP foci. Competition between lipids and DNA for the same region of  
287 the protein, or lipid-induced changes in the association state and/or conformation of MatP  
288 hampering DNA binding, may explain the lack of DNA recruitment to the membrane.

289  
290 Recent studies have revealed that, like MatP, other proteins binding to the bacterial chromosome  
291 are also able of interacting with lipid membranes. Examples of these proteins are the nucleoid  
292 occlusion Noc from *Bacillus subtilis* (14), a negative modulator of Z-ring assembly, and SeqA  
293 from *E. coli*, a protein involved in the sequestration of replication origins (24). Along the same  
294 line, the nucleoprotein complexes of SlmA, the factor counteracting Z-ring formation around the  
295 chromosome in *E. coli*, seem to be brought close to the membrane (4, 25, 26), possibly through  
296 transertional linkages (25) and/or biomolecular condensation (27). Conversely, well-known  
297 membrane associated proteins like MinD from the Min system (28) have also been shown to  
298 interact, in a non-sequence specific manner, with chromosomal DNA (13).

299  
300 Membrane binding of MatP may serve to sequester the protein from the chromosome under  
301 conditions in which its positive regulation of Z-ring formation is no longer required and even  
302 might obstruct the function of proteins like FtsK. FtsK is needed for the deconcatenation of sister  
303 chromosomes and helps to segregate the termini into each daughter cell (9, 29). FtsK, part of the  
304 divisome (30), is one of the fastest DNA translocases (31). Membrane binding of MatP released  
305 by FtsK during this relatively short time interval might function to prevent rebinding to the *matS*  
306 sites close to the *dif* site. We propose that *matS* and lipid competition for MatP assist in the  
307 segregation of the *dif* region by FtsK during the last step of septum closure (**Fig. 5**). The  
308 subsequent release from the membrane to bind again the *matS* sites might be assisted by the  
309 oscillation behaviour of MinD that displaces proteins from the membrane surface of the new

310 poles (32, 33). It is well known that the Min system oscillates between the old poles and the  
311 newly formed septum before the daughter cells have separated (34).

312

313 The main difference between the dual recognition of lipids and DNA by MatP and the other site  
314 selection proteins (Noc and MinD) is that the latter can simultaneously bind DNA and lipids.  
315 Furthermore, in the particular case of Noc, binding to DNA activates in turn the subsequent  
316 interaction with the membrane (14). In bacillary bacteria, DNA-membrane interactions may aid  
317 in the localization of the bacterial cell centre, where the strength of these interactions decreases,  
318 and Z-ring assembly is favoured (35). By bridging the chromosome and the membrane, negative  
319 regulators of FtsZ polymerization such as Noc would exclude FtsZ from those areas biasing FtsZ  
320 assembly to the midcell (14). In contrast, physical connection of the chromosome with the  
321 membrane through MatP may interfere with its positive regulation of FtsZ assembly that  
322 contributes to division ring positioning. In the last step of binary fission that requires  
323 deconcatenation of sister chromosomes and closure of the septum, MatP's presence might not be  
324 beneficial any longer. Therefore, it is displaced to the membrane to prevent immediate rebinding  
325 to the Ter domain, which would happen otherwise given its high affinity for these sites.

326

327 Since its identification, the function of MatP and its modulation in the context of division have  
328 been traditionally linked to its specific binding to DNA sequences within the Ter macrodomain  
329 or to its interaction with other proteins such as ZapB. Our findings strongly suggest that, in  
330 addition to protein-nucleic acid and protein-protein interactions, protein-lipid recognition should  
331 also be taken into account in the analysis of the function of MatP. Further work will be required  
332 to elucidate the precise mechanisms of these protein-membrane interactions and the factors  
333 influencing them.

334

335

## 336 **METHODS**

337 **Chemicals and reagents.** Polar extract of *E. coli* phospholipids, from Avanti Polar Lipids (AL,  
338 USA), was stored in chloroform at -20°C. Analytical grade chemicals were from Sigma. Silica  
339 microbeads were from Bangs Laboratories. Alexa Fluor 488 carboxylic acid succinimidyl ester  
340 dye was from Molecular Probes/Thermo Fisher Scientific. HPLC purified oligonucleotides

341 containing the *matS19* sequence targeted by MatP (AAAGTGACACTGTCACCTT, bases  
342 recognized by the protein in bold) (5), with or without fluorescein or Alexa 647 covalently  
343 attached to the 5' end of the sense oligonucleotide, were purchased from Microsynth or IDT.  
344 Complementary strands were hybridized by heating at 85°C in a thermocycler and slowly  
345 cooling down. The fluorescently labelled oligonucleotide (*matS*-Fl or *matS*-Alexa 647) was  
346 hybridized with a 10% excess of the unlabelled complementary strand. All *in vitro* experiments  
347 were done in 50 mM Tris-HCl, 300 mM KCl, 5 mM MgCl<sub>2</sub>, pH 7.5 (working buffer).

348 **Bacterial strains and growth conditions.** MG1655 *matP-mCh::kan*, a kind gift of Pauline  
349 Dupaigne (17), was grown to steady state in minimal glucose medium (Gb4: 6.33 g K<sub>2</sub>HPO<sub>4</sub>  
350 (Merck), 2.95 g KH<sub>2</sub>PO<sub>4</sub> (Riedel de Haen), 1.05 g (NH<sub>4</sub>)<sub>2</sub>SO<sub>4</sub> (Sigma), 0.10 g MgSO<sub>4</sub>·7H<sub>2</sub>O  
351 (Roth), 0.28 mg FeSO<sub>4</sub>·7H<sub>2</sub>O (Sigma), 7.1 mg Ca(NO<sub>3</sub>)<sub>2</sub>·4H<sub>2</sub>O (Sigma), 4 mg thiamine (Sigma),  
352 50 mg lysine (Sigma), 50 mg arginine (Sigma), 50 mg glutamine (Sigma), 2 mg thymidine  
353 (Sigma), 20 mg·L<sup>-1</sup> Uracil (Sigma) and 4 g glucose per litre, pH 7.0) at 28°C while shaking at  
354 205 rpm. At an OD<sub>450nm</sub> of 0.2 (Biochrom Libra S70 spectrophotometer, Harvard Biosciences)  
355 cells were fixed by 2.8% formaldehyde and 0.04% glutaraldehyde for 15 min before being  
356 washed in PBS (36). After splitting in two batches, the one batch was immunolabelled with  
357 antibodies against ZapB and the other with antibodies against FtsN (16) as described (36). The  
358 nucleoids were then stained with 1 µg/mL DAPI. Secondary antibodies were donkey anti rabbit  
359 IgG conjugated to Oregon Green (Jackson Immunoresearch). When cells were imaged live, they  
360 were concentrated and resuspended gently in their own medium. Expression of pXL28 mNG-  
361 GlpT was induced for 2 mass doublings with 15 or 30 µM IPTG (Isopropyl β-D-1-  
362 thiogalactopyranoside, Duchefa) for widefield fluorescence microscopy and structured  
363 Illumination Microscopy, respectively.

364 **Microscopy and image analysis.** For imaging the cells were immobilized on 1% agarose in  
365 water slabs on object glasses (37) and phase contrast and fluorescence microscopy images were  
366 obtained using a Nikon Eclipse Ti microscope equipped with a C11440-22CU Hamamatsu  
367 ORCA camera, an Intensilight HG 130W lamp and the NIS elements software (version 4.20.01).  
368 First a phase contrast image was taken through a CFI Plan Apochromat DM 100× oil objective,  
369 followed by a MatP-mCherry image using custom mCherry filter ex570/20, dic600LP,  
370 em605LP, a ZapB or ZapN image using GFP filter ex480/40, dic505, em535/50 and finally a  
371 DAPI image using filter ex360/40, dic400, em460/25. Images were analysed with Coli-Inspector

372 supported by the ObjectJ plugin for ImageJ (version 1.49v) (16). Briefly, the length and diameter  
373 of more than 1200 individual cells were marked and analysed in the phase contrast images.  
374 Fluorescence and phase contrast images were aligned and fluorescence background was  
375 subtracted as described (16). The fluorescence of each cell was collected in a one-pixel wide bar  
376 with the length of the cell. A map of the diameter or the fluorescence localization and intensity  
377 was generated with the cells sorted according to increasing cell from left to right. Because cells  
378 were grown to steady state, the length of the cells can be directly correlated to the cell division  
379 cycle age. An age profile is created from all cell profiles in a map of a particular age range. They  
380 are first resampled to a normalized cell length of 100 data points, then averaged to a single plot  
381 using the macro Coli-Inspector-03s in ObjectJ (16). Concentration of the number of MatP  
382 molecules per cell and the number of molecules MatP at midcell were determined as described  
383 (16). Calculation of the Pearson coefficient of the colocalization of MatP and GlpT was  
384 determined as described (21).

385 **SIM sample preparation and imaging.** Micron holes (1.1-1.4  $\mu\text{m}$ ) (38) were made with a  
386 micropillar mold in a 3% agarose in Gb4 medium layer to orient the cells vertically. Cells were  
387 concentrated by centrifugation and applied to the agarose alive. Part of the cells would enter the  
388 holes while another part would lay on top of the layer. To immobilize the cells in these holes, as  
389 MG1655 bacteria are able to rotate and move when imaged alive as they have flagella, a thin  
390 layer of 1% low melting point agarose in Gb4 medium was applied on top. A cover glass was  
391 then applied and taped to the glass slide.

392 SIM images were obtained with a Nikon Ti Eclipse microscope and captured using a Hamamatsu  
393 Orca-Flash 4.0 LT camera. Images were obtained with a SR APO TIRF 100x/1.49 oil objective,  
394 using 3D-SIM illumination with a 488 nm laser and an exposure time of 0.3 sec for the  
395 mNeonGreen-GlpT and a 561 nm laser with an exposure time of 1 sec for the MatP-mCherry,  
396 and were reconstructed (note that each reconstructed SIM image consists of 15 images) with  
397 Nikon-SIM software using for each picture adapted values for the parameters Illumination  
398 Modulation Contrast (IMC), High Resolution Noise suppression (HNS) and Out of focus Blur  
399 Suppression (OBS).

400 **MatP expression, purification and labelling.** Recombinant untagged MatP was produced as  
401 previously described (17), with some modifications, from the plasmid kindly provided by Dr. M  
402 Schumacher. Briefly, the N-terminal hexa-histidine (His) tagged protein was overproduced and

403 purified by affinity chromatography using a His-bind Resin (Novagen) with nickel. The His-tag  
404 was subsequently removed by cleavage with thrombin, followed by an ionic exchange  
405 chromatography step using a HiTrap SP HP column (GE Healthcare). The fractions of purified  
406 MatP were pooled, dialyzed against 50 mM Tris-HCl, 300 mM KCl, 1 mM EDTA, 10%  
407 glycerol, pH 7.5 and stored at  $-80^{\circ}\text{C}$ . The protein concentration was measured by UV-absorbance  
408 spectroscopy using a molar absorption coefficient at 280 nm of  $27960\text{ M}^{-1}\text{cm}^{-1}$ , estimated from  
409 its sequence. MatP was covalently labelled in the amino groups with Alexa Fluor 488 carboxylic  
410 acid succinimidyl ester dye (MatP-Alexa488) and stored at  $-80^{\circ}\text{C}$ . The ratio of labelling was  
411 around 0.5 moles of fluorophore per mole of protein, as estimated from their molar absorption  
412 coefficients.

413 **Microfluidic encapsulation in microdroplets, generation of giant unilamellar vesicles and**  
414 **visualization by confocal fluorescence microscopy.** Microfluidic devices were constructed by  
415 conventional soft lithographic techniques from masters (chip design and procedure detailed  
416 elsewhere (39)). Encapsulation was conducted at room temperature by mixing two streams of  
417 dispersed aqueous phases in a 1:1 ratio prior to the droplet formation junction. MatP ( $7\text{ }\mu\text{M}$ ) with  
418 a tracer amount labelled with Alexa 488 ( $2\text{ }\mu\text{M}$ ) in working buffer was one of the aqueous  
419 phases, the other one being buffer including, when stated, *matS*-Alexa 647 ( $2.8\text{ }\mu\text{M}$ ). When  
420 present, both aqueous streams contained crowders (Ficoll or dextran). The third stream supplied  
421 the *E. coli* lipid mixture at  $20\text{-}25\text{ g}\cdot\text{L}^{-1}$  in mineral oil, prepared shortly before use by two cycles  
422 of vortex/sonication resuspension in the mineral oil of a lipid film obtained using a SpeedVac  
423 device. Encapsulation was also conducted including the preformed MatP-*matS* complex in the  
424 two aqueous streams. Data presented correspond to experiments delivering solutions at  $160\text{ }\mu\text{L}/\text{h}$   
425 (oil phase) and  $20\text{ }\mu\text{L}/\text{h}$  (aqueous phases) by automated syringe pumps (Cetoni GmbH) yielding  
426 uniform droplets. Droplets were collected during 30 min for their subsequent conversion into  
427 giant unilamellar vesicles as described elsewhere (23), introducing the outlet tubing from the  
428 microfluidic chip into  $700\text{ }\mu\text{L}$  of oil phase stabilized for 1 hour over  $400\text{ }\mu\text{L}$  of outer solution.  
429 Composition of the outer solution matched the encapsulated solutions, supplemented with  
430 sucrose to achieve  $\sim 25\text{ mOsmol}/\text{Kg}$  higher osmolarity as measured in an Osmomat 3000  
431 (Gonotec GmbH). The solutions were then centrifuged (10-15 min, 1500 rpm in a bench  
432 centrifuge), the oil phase removed and the vesicles washed with outer solution and centrifuged  
433 again (10-15 min, 2000 rpm).

434 Microfluidic production of droplets on chip was monitored with an Axiovert 135 fluorescence  
435 microscope (Zeiss). The resulting microdroplets and GUVs were visualized immediately after  
436 generation by confocal microscopy with a Leica TCS-SP2 or TCS-SP5 inverted confocal  
437 microscope as previously described (23, 40). Intensity profiles in the green and red channels  
438 were obtained applying the line tool of ImageJ (National Institutes of Health) through the  
439 equatorial section of the droplets/vesicles.

440 **Preparation of multilamellar vesicles.** Chloroform solutions of EcL were dried using a  
441 SpeedVac device. Multilamellar vesicles (MLVs) were obtained by hydration of the dried lipid  
442 film in magnesium free working buffer followed by two cycles of brief vortexing and incubation  
443 at 37°C.

444 **Bio-layer interferometry measurements.** Lipid-protein interactions were measured by bio-  
445 layer interferometry using a single channel BLItz system (ForteBio). From the EcL MLVs, small  
446 unilamellar vesicles (SUVs) were freshly prepared before the experiments by sonication (41),  
447 and diluted in hydration buffer (50 mM Tris-HCl, 150 mM KCl, pH 7.5) to a final  $0.5 \text{ g}\cdot\text{L}^{-1}$   
448 concentration. Lipids were then immobilized on aminopropylsilane biosensor tips. MatP binding  
449 to the immobilized lipids was measured at the specified final protein concentrations at room  
450 temperature and with vigorous shaking (2200 rpm). Measurements were also performed in the  
451 presence of  $1 \mu\text{M}$  *matS* or at variable concentration of *matS* keeping MatP at 150 nM. Assays  
452 were performed by duplicate, and binding isotherms were constructed by representing the  
453 experimental binding values at equilibrium vs MatP total concentration.

454 **Binding assays in lipid coated microbeads.** Microbeads coating and binding measurements  
455 were done basically as described (42). Briefly, silica microbeads were washed, resuspended in  
456 working buffer and incubated with an excess of coating material. After removal of lipids excess  
457 and further processing to ensure even coating, microbeads were resuspended in working buffer to  
458 get the required stock concentration. The amount of lipid coating the microbeads was estimated,  
459 assuming a single bilayer and the reported value for phosphatidylcholine (43), from the surfaces  
460 ratio (gram of beads/polar head of a lipid molecule) (42). MatP binding experiments were done  
461 at constant  $35 \text{ g}\cdot\text{L}^{-1}$  beads ( $62 \mu\text{M}$  accessible lipids) and variable concentration of MatP-Alexa  
462 488. Experiments in the presence of *matS* were performed by adding, prior or after incubation  
463 with the lipids, unlabelled *matS* ( $0.1$  or  $1 \mu\text{M}$ ) to the samples containing MatP-Alexa 488 ( $0.250$   
464  $\mu\text{M}$ ). Additionally, *matS*-Fl ( $0.1 \mu\text{M}$ ) was added to samples containing unlabelled MatP ( $0.250$

465  $\mu\text{M}$ ) and lipids. After incubation of the protein or the nucleoprotein complex with the coated  
466 beads for 20 minutes, bound material was separated by centrifugation from the free  
467 protein/nucleoprotein complex, that remained in the supernatant and was quantified using a  
468 fluorescence plate reader (Varioskan Flash, Thermo or Polar Star Galaxy, BMG Labtech) as  
469 described (42). Assays were performed by triplicate, and the binding isotherm was constructed  
470 by plotting the concentration of bound MatP as a function of concentration of free MatP. The  
471 linearity of the signal of the labelled protein with its concentration was verified.

472 **Analysis of protein-lipid binding isotherms.** Binding parameters were obtained independently  
473 from the analysis of the binding isotherms from interferometry or fluorescence measurements by  
474 a nonlinear least-squares fit of a Langmuir adsorption isotherm:

475

$$476 \quad y = y_{\max} \frac{(c/c_{50})}{1 + (c/c_{50})}$$

477

478 where  $y$  and  $y_{\max}$  are the response and maximum response measured upon binding, respectively,  
479  $c$  is the concentration of MatP and  $c_{50}$  is the concentration of MatP at which binding is half of the  
480 maximum value.

481 The method of parameter scanning (44) was employed to determine the extent to which the value  
482 of the best-fit parameter is determined by the data, as explained elsewhere (42).

483

#### 484 **ACKNOWLEDGEMENTS**

485 We thank M. Schumacher (Duke University) for kindly providing the MatP plasmid, X. Liu for  
486 the gift of pXL28 mNG-(GGG)<sub>2</sub>-GlpT, P. Dupaigne for the gift of the strain MG1655  
487 *matP::mCh*, W.T.S. Huck and A. Piruska (Radboud University) for the kind gift of silicon  
488 masters with the chip designs, M.T. Seisdedos and G. Elvira (Confocal Laser and  
489 Multidimensional Microscopy Facility, CIB-CSIC), the Technical Support Facility (CIB-CSIC),  
490 J.R. Luque-Ortega (Analytical Ultracentrifugation and Light Scattering Facility, CIB-CSIC), N.  
491 Roper for technical assistance, and Norbert O. E. Vischer for fruitful discussion on the analysis  
492 of foci positions.

493 This work was supported by the Spanish government through grants BFU2014-52070-C2-2-P  
494 and BFU2016-75471-C2-1-P (to G. R.) and by the Dutch government through grant NWO ALW



495 open program nr. 822.02.019 (to N. Y. M.). The funders had no role in the design; data  
496 collection, analysis or interpretation; manuscript writing or the decision to submit the article for  
497 publication. The authors declare no conflicting interests.

498

#### 499 **Author contributions**

500 B.M., S.Z. and G.R. conceived the experimental work; B.M., S.Z., C.A., N.Y.M. and T.d.B.  
501 analysed results; B.M., S.Z., M.S.-S., M.R.-R, C.A., N.Y.M, and J.V. performed experimental  
502 work; B.M., S.Z., C.A., N.Y.M, T.d.B and G.R. discussed the results and wrote the manuscript;  
503 B.S. provided the mould to make SIM agar holes. All authors read and approved the final  
504 manuscript.

505

506

#### 507 **REFERENCES**

- 508 1. Haeusser DP, Margolin W. 2016. Splitsville: structural and functional insights into the  
509 dynamic bacterial Z ring. *Nat Rev Microbiol* 14:305-319.
- 510 2. Ortiz C, Natale P, Cueto L, Vicente M. 2016. The keepers of the ring: regulators of FtsZ  
511 assembly. *FEMS Microbiol Rev* 40:57-67.
- 512 3. Bailey MW, Bisicchia P, Warren BT, Sherratt DJ, Mannik J. 2014. Evidence for  
513 divisome localization mechanisms independent of the Min system and SlmA in  
514 *Escherichia coli*. *PLoS Genet* 10:e1004504.
- 515 4. Mannik J, Bailey MW. 2015. Spatial coordination between chromosomes and cell  
516 division proteins in *Escherichia coli*. *Front Microbiol* 6:306.
- 517 5. Mercier R, Petit MA, Schbath S, Robin S, El Karoui M, Boccard F, Espeli O. 2008. The  
518 MatP/matS site-specific system organizes the terminus region of the *E. coli* chromosome  
519 into a macrodomain. *Cell* 135:475-85.
- 520 6. Cho H, McManus HR, Dove SL, Bernhardt TG. 2011. Nucleoid occlusion factor SlmA is  
521 a DNA-activated FtsZ polymerization antagonist. *Proc Natl Acad Sci U S A* 108:3773-8.
- 522 7. Nolivos S, Upton AL, Badrinarayanan A, Muller J, Zawadzka K, Wiktor J, Gill A,  
523 Arciszewska L, Nicolas E, Sherratt D. 2016. MatP regulates the coordinated action of  
524 topoisomerase IV and MukBEF in chromosome segregation. *Nat Commun* 7:10466.

- 525 8. Espeli O, Borne R, Dupaigne P, Thiel A, Gigant E, Mercier R, Boccard F. 2012. A MatP-  
526 divisome interaction coordinates chromosome segregation with cell division in *E. coli*.  
527 *EMBO J* 31:3198-211.
- 528 9. Galli E, Midonet C, Paly E, Barre FX. 2017. Fast growth conditions uncouple the final  
529 stages of chromosome segregation and cell division in *Escherichia coli*. *PLoS Genet*  
530 13:e1006702.
- 531 10. Lioy VS, Cournac A, Marbouty M, Duigou S, Mozziconacci J, Espeli O, Boccard F,  
532 Koszul R. 2018. Multiscale Structuring of the *E. coli* Chromosome by Nucleoid-  
533 Associated and Condensin Proteins. *Cell* 172:771-783 e18.
- 534 11. Bonne L, Bigot S, Chevalier F, Allemand JF, Barre FX. 2009. Asymmetric DNA  
535 requirements in Xer recombination activation by FtsK. *Nucleic Acids Res* 37:2371-80.
- 536 12. Graham JE, Sivanathan V, Sherratt DJ, Arciszewska LK. 2010. FtsK translocation on  
537 DNA stops at XerCD-dif. *Nucleic Acids Res* 38:72-81.
- 538 13. Di Ventura B, Knecht B, Andreas H, Godinez WJ, Fritsche M, Rohr K, Nickel W,  
539 Heermann DW, Sourjik V. 2013. Chromosome segregation by the *Escherichia coli* Min  
540 system. *Mol Syst Biol* 9:686.
- 541 14. Adams DW, Wu LJ, Errington J. 2015. Nucleoid occlusion protein Noc recruits DNA to  
542 the bacterial cell membrane. *EMBO J* 34:491-501.
- 543 15. Aarsman ME, Piette A, Fraipont C, Vinkenvleugel TM, Nguyen-Disteche M, den  
544 Blaauwen T. 2005. Maturation of the *Escherichia coli* divisome occurs in two steps. *Mol*  
545 *Microbiol* 55:1631-45.
- 546 16. Vischer NO, Verheul J, Postma M, van den Berg van Saparoea B, Galli E, Natale P,  
547 Gerdes K, Luirink J, Vollmer W, Vicente M, den Blaauwen T. 2015. Cell age dependent  
548 concentration of *Escherichia coli* divisome proteins analyzed with ImageJ and ObjectJ.  
549 *Front Microbiol* 6:586.
- 550 17. Dupaigne P, Tonthat NK, Espeli O, Whitfill T, Boccard F, Schumacher MA. 2012.  
551 Molecular basis for a protein-mediated DNA-bridging mechanism that functions in  
552 condensation of the *E. coli* chromosome. *Mol Cell* 48:560-71.
- 553 18. Li GW, Burkhardt D, Gross C, Weissman JS. 2014. Quantifying absolute protein  
554 synthesis rates reveals principles underlying allocation of cellular resources. *Cell*  
555 157:624-35.

- 556 19. Buss J, Coltharp C, Shtengel G, Yang X, Hess H, Xiao J. 2015. A multi-layered protein  
557 network stabilizes the *Escherichia coli* FtsZ-ring and modulates constriction dynamics.  
558 PLoS Genet 11:e1005128.
- 559 20. Liu X, Meiresonne NY, Bouhss A, den Blaauwen T. 2018. FtsW activity and lipid II  
560 synthesis are required for recruitment of MurJ to midcell during cell division in *E. coli*.  
561 bioRxiv doi:10.1101/230680.
- 562 21. Pende N, Wang J, Weber PM, Verheul J, Kuru E, Rittmann SKR, Leisch N,  
563 VanNieuwenhze MS, Brun YV, den Blaauwen T, Bulgheresi S. 2018. Host-Polarized  
564 Cell Growth in Animal Symbionts. *Curr Biol* 28:1039-1051 e5.
- 565 22. Carrara P, Stano P, Luisi PL. 2012. Giant vesicles "colonies": a model for primitive cell  
566 communities. *Chembiochem* 13:1497-502.
- 567 23. Sobrinos-Sanguino M, Zorrilla S, Keating CD, Monterroso B, Rivas G. 2017.  
568 Encapsulation of a compartmentalized cytoplasm mimic within a lipid membrane by  
569 microfluidics. *Chem Commun (Camb)* 53:4775-4778.
- 570 24. Dame RT, Kalmykova OJ, Grainger DC. 2011. Chromosomal macrodomains and  
571 associated proteins: implications for DNA organization and replication in gram negative  
572 bacteria. *PLoS Genet* 7:e1002123.
- 573 25. Tonthat NK, Milam SL, Chinnam N, Whitfill T, Margolin W, Schumacher MA. 2013.  
574 SlmA forms a higher-order structure on DNA that inhibits cytokinetic Z-ring formation  
575 over the nucleoid. *Proc Natl Acad Sci U S A* 110:10586-91.
- 576 26. Du S, Lutkenhaus J. 2014. SlmA antagonism of FtsZ assembly employs a two-pronged  
577 mechanism like MinCD. *PLoS Genet* 10:e1004460.
- 578 27. Monterroso B, Zorrilla S, Sobrinos-Sanguino M, Robles-Ramos MA, López-Álvarez M,  
579 Keating CD, Rivas G. 2018. Bacterial division FtsZ forms liquid condensates with  
580 nucleoid-associated Z-ring inhibitor SlmA. bioRxiv doi:10.1101/264192.
- 581 28. Rowlett VW, Margolin W. 2015. The Min system and other nucleoid-independent  
582 regulators of Z ring positioning. *Front Microbiol* 6:478.
- 583 29. Stouf M, Meile JC, Cornet F. 2013. FtsK actively segregates sister chromosomes in  
584 *Escherichia coli*. *Proc Natl Acad Sci U S A* 110:11157-62.

- 585 30. Yu XC, Tran AH, Sun Q, Margolin W. 1998. Localization of cell division protein FtsK to  
586 the *Escherichia coli* septum and identification of a potential N-terminal targeting domain.  
587 *J Bacteriol* 180:1296-304.
- 588 31. Lowe J, Ellonen A, Allen MD, Atkinson C, Sherratt DJ, Grainge I. 2008. Molecular  
589 mechanism of sequence-directed DNA loading and translocation by FtsK. *Mol Cell*  
590 31:498-509.
- 591 32. Shih Y-L, Huang L-T, Tu Y-M, Lee B-F, Bau Y-C, Hong CY, Lee H-l, Shih Y-P, Hsu  
592 M-F, Chen J-S, Lu Z-X, Chao L. 2018. Active Transport of Membrane Components by  
593 Self-Organization of the Min Proteins. bioRxiv doi:10.1101/418384.
- 594 33. Lee HL, Chiang IC, Liang SY, Lee DY, Chang GD, Wang KY, Lin SY, Shih YL. 2016.  
595 Quantitative Proteomics Analysis Reveals the Min System of *Escherichia coli* Modulates  
596 Reversible Protein Association with the Inner Membrane. *Mol Cell Proteomics* 15:1572-  
597 83.
- 598 34. Juarez JR, Margolin W. 2010. Changes in the Min oscillation pattern before and after cell  
599 birth. *J Bacteriol* 192:4134-4142.
- 600 35. Rabinovitch A, Zaritsky A, Feingold M. 2003. DNA-membrane interactions can localize  
601 bacterial cell center. *J Theor Biol* 225:493-6.
- 602 36. Buddelmeier N, Aarsman MEG, Blaauwen d, T. . 2013. Immunolabeling of Proteins in  
603 Situ in *Escherichia coli* K12 Strains. bio-protocoll 1–4 [http://wwwbio-](http://wwwbio-protocol.org/wenzhangaspx?id=852)  
604 [protocolorg/wenzhangaspx?id=852](http://wwwbio-protocol.org/wenzhangaspx?id=852).
- 605 37. Koppelman CM, Aarsman ME, Postmus J, Pas E, Muijsers AO, Scheffers DJ, Nanninga  
606 N, den Blaauwen T. 2004. R174 of *Escherichia coli* FtsZ is involved in membrane  
607 interaction and protofilament bundling, and is essential for cell division. *Mol Microbiol*  
608 51:645-57.
- 609 38. Söderström B, Chan H, Shilling PJ, Skoglund U, Daley DO. 2018. Spatial separation of  
610 FtsZ and FtsN during cell division. *Mol Microbiol* 107:387-401.
- 611 39. Mellouli S, Monterroso B, Vutukuri HR, te Brinke E, Chokkalingam V, Rivas G, Huck  
612 WTS. 2013. Self-organization of the bacterial cell-division protein FtsZ in confined  
613 environments. *Soft Matter* 9:10493-10500.

- 614 40. Monterroso B, Zorrilla S, Sobrinos-Sanguino M, Keating CD, Rivas G. 2016.  
615 Microenvironments created by liquid-liquid phase transition control the dynamic  
616 distribution of bacterial division FtsZ protein. *Sci Rep* 6:35140.
- 617 41. Martos A, Raso A, Jimenez M, Petrsek Z, Rivas G, Schwille P. 2015. FtsZ Polymers  
618 Tethered to the Membrane by ZipA Are Susceptible to Spatial Regulation by Min Waves.  
619 *Biophys J* 108:2371-83.
- 620 42. Sobrinos-Sanguino M, Zorrilla S, Monterroso B, Minton AP, Rivas G. 2017. Nucleotide  
621 and receptor density modulate binding of bacterial division FtsZ protein to ZipA  
622 containing lipid-coated microbeads. *Sci Rep* 7:13707.
- 623 43. Hauser H. 2000. Short-chain phospholipids as detergents. *Biochim Biophys Acta*  
624 1508:164-81.
- 625 44. Saroff HA. 1989. Evaluation of uncertainties for parameters in binding studies: the sum-  
626 of-squares profile and Monte Carlo estimation. *Anal Biochem* 176:161-9.
- 627

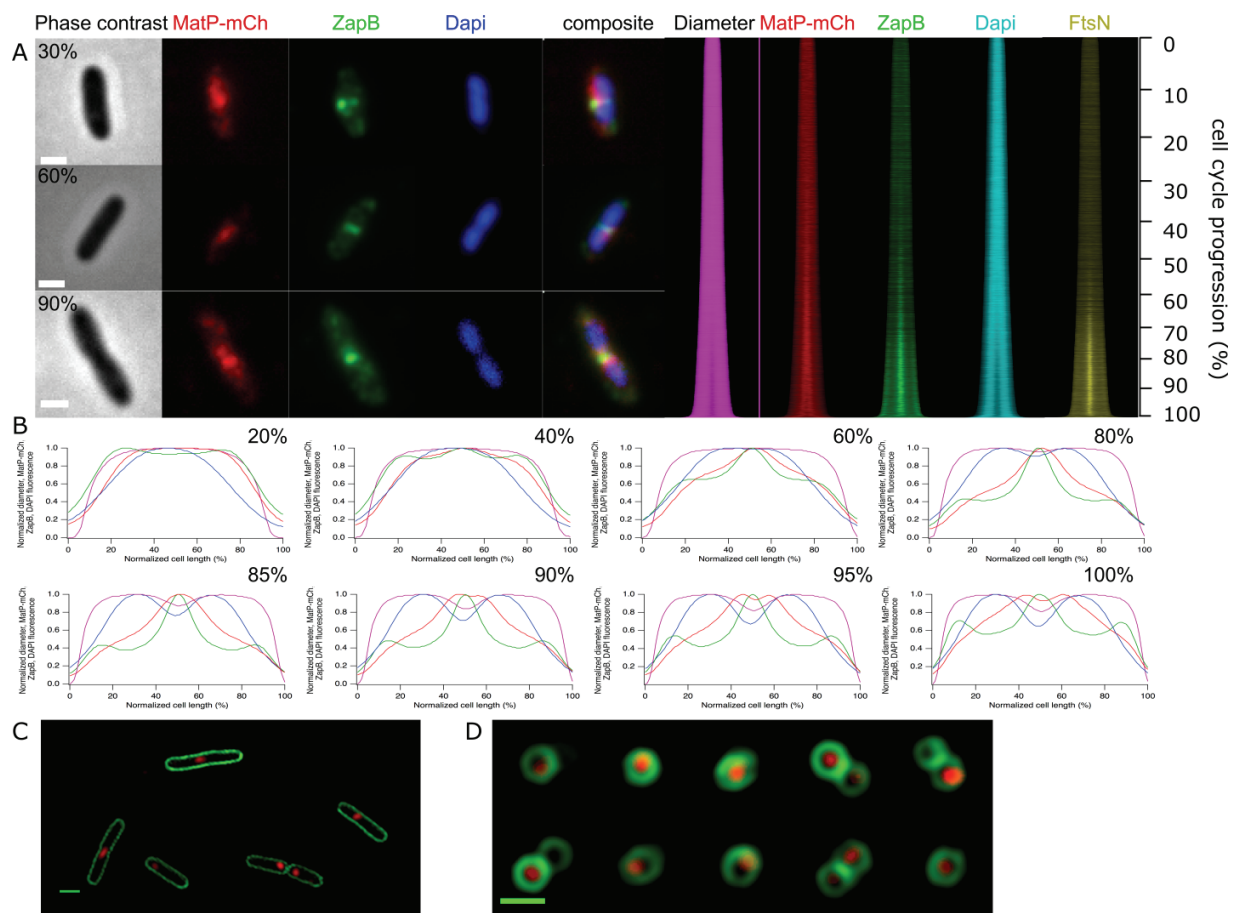

628

629

630

631 **Fig. 1. Localization of MatP as a function of the cell division cycle.** (A) A representative  
 632 example of a cell of age class 30%, 60% and 90% from top to bottom and from left to right:  
 633 Phase contrast and fluorescence images of MatP-mCh, immunolabelled ZapB and DAPI stained  
 634 nucleoids are shown. The map of profiles shows in the same order the diameter determined in the  
 635 phase contrast images, and the fluorescence as a function of cell length. The numbers on the right  
 636 show the relation between length and cell division cycle age. (B) Peak normalized average  
 637 profiles from the maps of the diameter and fluorescence were plotted against the normalized cell  
 638 length in age bins of 0-20%, 20-40%, 40-60%, 60-80%, 80-85%, 85-90%, 90-95% and 95-100%.  
 639 The age class with the smallest number of cells, *i.e.* 95-100% still contains 592 cells. In total  
 640 16796 cells were analysed. (C) SIM images of life MG1655 *matP-mCh::kan* transformed with  
 641 the plasmid pXL28 that expresses the integral membrane protein fusion mNeonGreen-(GGs)<sub>2</sub>-  
 642 GlpT. The cells had been grown in Gb4 minimal medium at 28°C and induced for 2 mass  
 643 doublings with 30 μM IPTG. (D) SIM images of upright positioned cells grown as in C. The 10  
 644 cells shown are all from a single image without selection and grouped together to reduce the  
 645 figure size. All scalebars equal 2 μm.

646

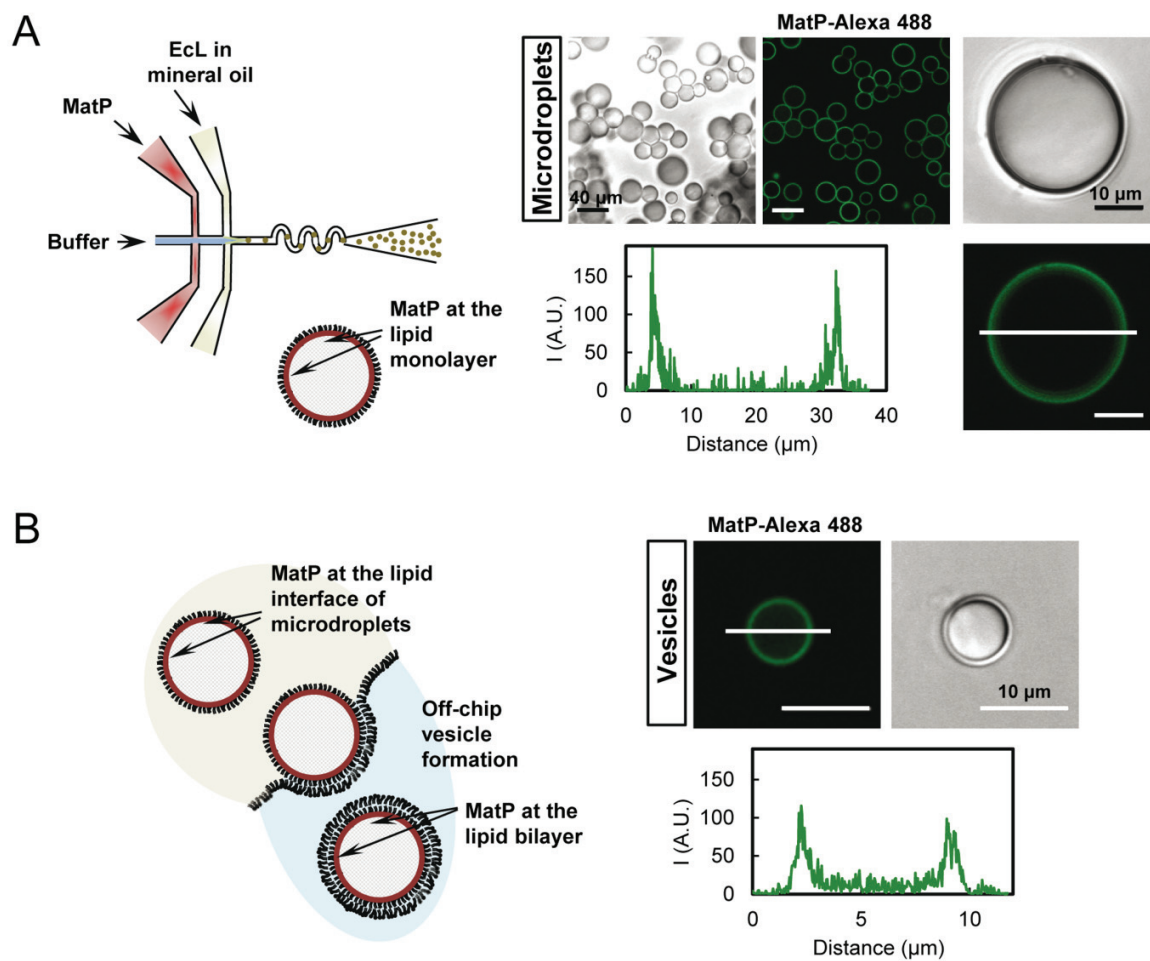

647

648

649 **Fig. 2. Microfluidic encapsulation of MatP inside microdroplets stabilized by the *E. coli***

650 **lipid mixture and GUVs formed from them.** (A) Scheme of the encapsulation setup and of the

651 distribution of species within the droplet (left). Representative confocal and transmitted images

652 of the microdroplets containing MatP (3.5  $\mu\text{M}$ ), and intensity profile corresponding to the green

653 channel (MatP-Alexa 488, 1  $\mu\text{M}$ ), obtained across the line as drawn in the image (right). (B)

654 Illustration of the step determining vesicle formation from the droplets with MatP and of the

655 distribution of species within the GUVs (left). Representative confocal and transmitted images of

656 GUVs and intensity profile corresponding to the green channel (MatP-Alexa 488), obtained

657 across the line as drawn in the image (right). Vesicles contained 150  $\text{g}\cdot\text{L}^{-1}$  Ficoll.

658

659

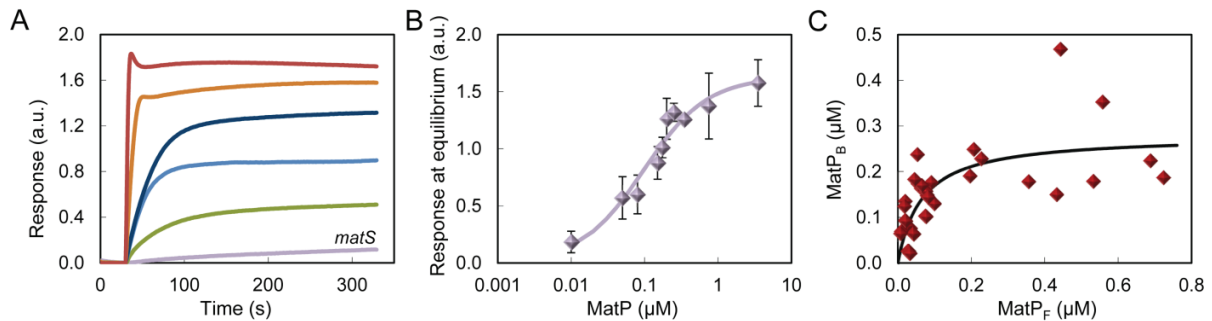

660

661

662 **Fig. 3. Binding of MatP to *E. coli* lipids by bio-layer interferometry or using lipid coated**

663 **microbeads.** (A) Representative profiles of the binding of MatP at increasing concentrations

664 obtained by bio-layer interferometry. From bottom to top, 100, 150, 250, 750 nM and 3.5 μM.

665 The profile obtained for *matS* is shown for comparison. (B) Dose-response curve obtained as a

666 function of the concentration of MatP. Solid line is the best fit according to the model explained

667 in the main text rendering the following parameter values:  $c_{50} = 97$  nM and  $y_{max} = 1.6$ . (C) MatP

668 binding to *E. coli* lipid coated microbeads plotted as a function of the concentration of free MatP.

669 Symbols are the data, and the solid line is the best fit according to the model explained in the

670 main text rendering the parameter values  $c_{50} = 65$  nM and  $y_{max} = 280$  nM. [Beads] =  $35 \text{ g} \cdot \text{L}^{-1}$  (62

671 μM accessible lipid). MatP was labelled with Alexa 488.

672

673

674

675

676

677

678

679

680

681

682



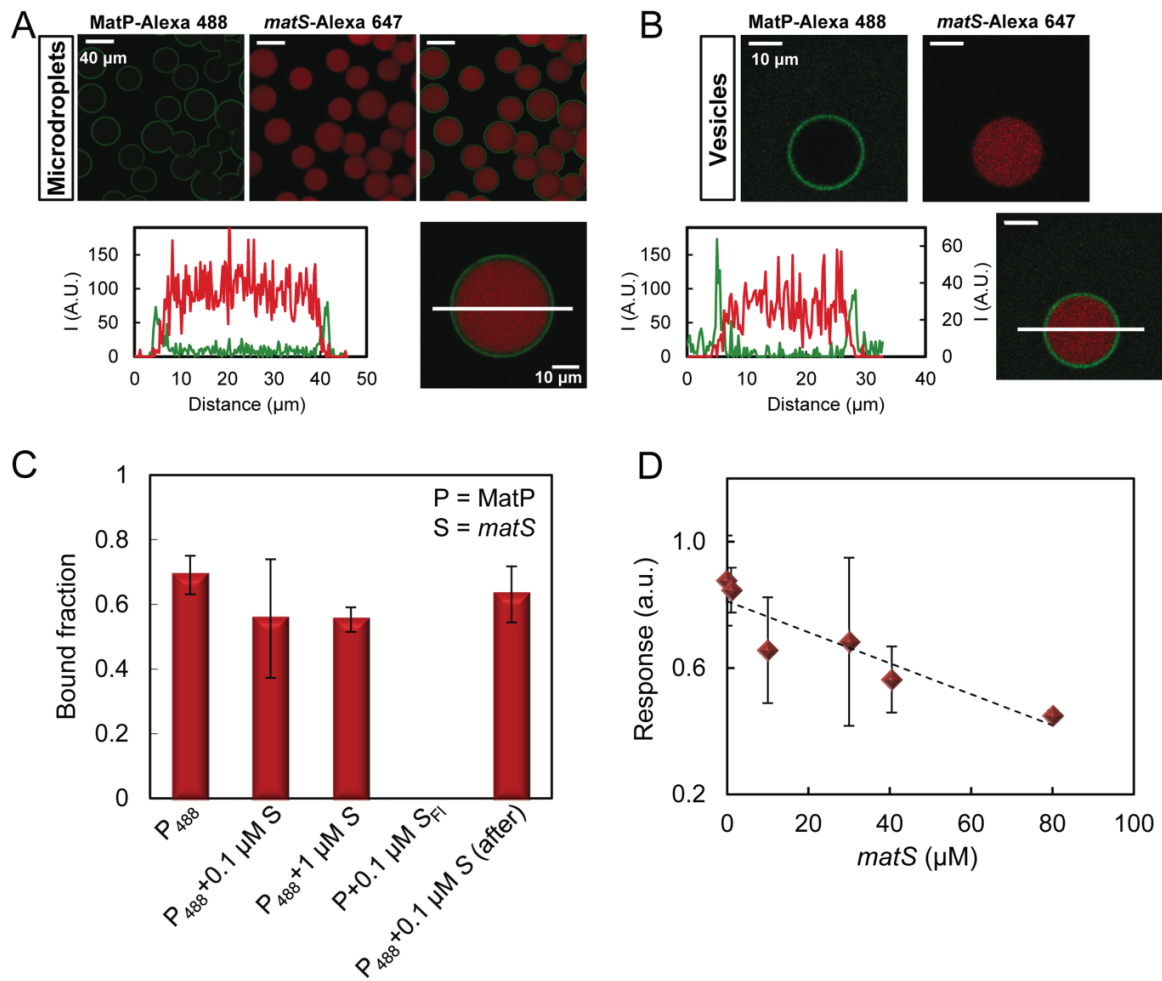

683

684

685 **Fig. 4. Binding of MatP to lipids in the presence of *matS*.** (A, B) Representative confocal  
 686 images of microdroplets and GUVs, respectively, stabilized by the *E. coli* lipids mixture  
 687 containing MatP and *matS*, and intensity profiles below. Vesicles also contained 150 g·L<sup>-1</sup> Ficoll.  
 688 Profiles correspond to the green (MatP-Alexa 488, 1  $\mu\text{M}$ ) and red (*matS*-Alexa 647, 1  $\mu\text{M}$ )  
 689 channels, obtained across the line as drawn in the images. The concentrations of MatP and *matS*  
 690 were 3.5 and 1.4  $\mu\text{M}$  respectively. (C) Effect of *matS* on MatP binding to lipid coated beads (30  
 691 g·L<sup>-1</sup>, 53  $\mu\text{M}$  accessible lipid). MatP concentration was 0.25  $\mu\text{M}$ . P, P<sub>488</sub>, S and S<sub>Fl</sub> stand for  
 692 MatP, MatP labelled with Alexa 488, *matS* and *matS* labelled with fluorescein, respectively. For  
 693 the measurement corresponding to the bar on the far right, *matS* was added to MatP already  
 694 bound to the lipid. (D) Competition of *matS* with the lipids for binding to MatP as observed by  
 695 bio-layer interferometry. The concentration of MatP was 0.15  $\mu\text{M}$ .

696  
697  
698  
699  
700  
701  
702  
703  
704  
705  
706  
707  
708  
709  
710  
711  
712  
713  
714  
715  
716  
717  
718  
719  
720  
721  
722  
723  
724  
725  
726  
727  
728  
729  
730

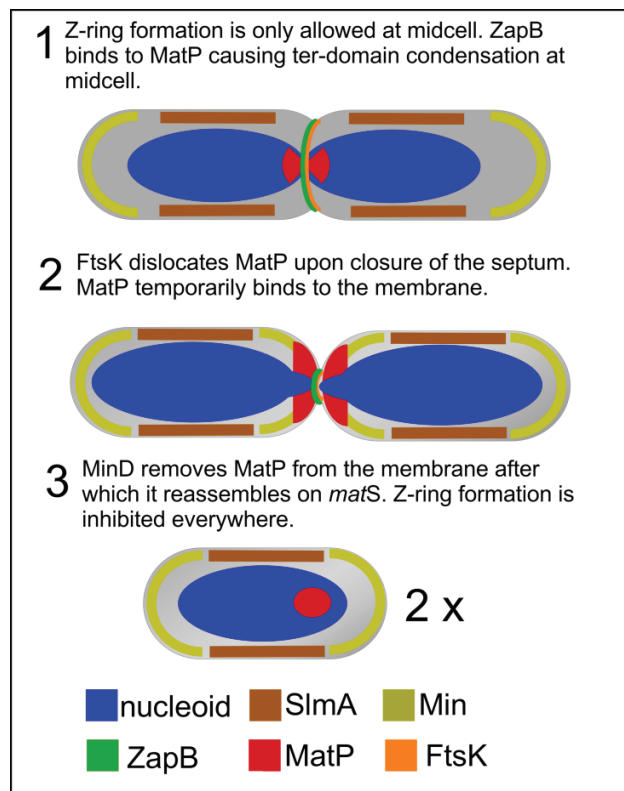

**Fig. 5. Hypothetical model for the MatP dissociation from the *matS* sites and its binding to the cytoplasmic membrane.** 1. ZapB is binding MatP at midcell causing the 23 *matS* sites to cluster together and ensures that the terminus remains at midcell. Z-ring formation is inhibited at the old poles by the Min system and in the cylindrical part of the cell close to the bulk of the nucleoid, but not in the Ter-domain, by the nucleoid occlusion protein SlmA. 2. The nucleoids are segregating and MatP is pulled away from ZapB. At the same time the terminus is bound by FtsK that displaces MatP from *matS* sites by translocation of the DNA near the terminus, which allows final segregation of the nucleoids into the daughter cells. 3. MinD removes MatP from the membrane after which it reassembles on *matS*. Z-ring formation is inhibited everywhere by the Min system and the nucleoid occlusion protein SlmA.
